# Supplementary material
Source: PubMed Central journal article supplement (PMC7291805)

**Figure 1. Study flow diagram**

SGR= SMS text-based scheduled gradual reduction and counseling intervention; support only = SMS text-based counseling intervention only

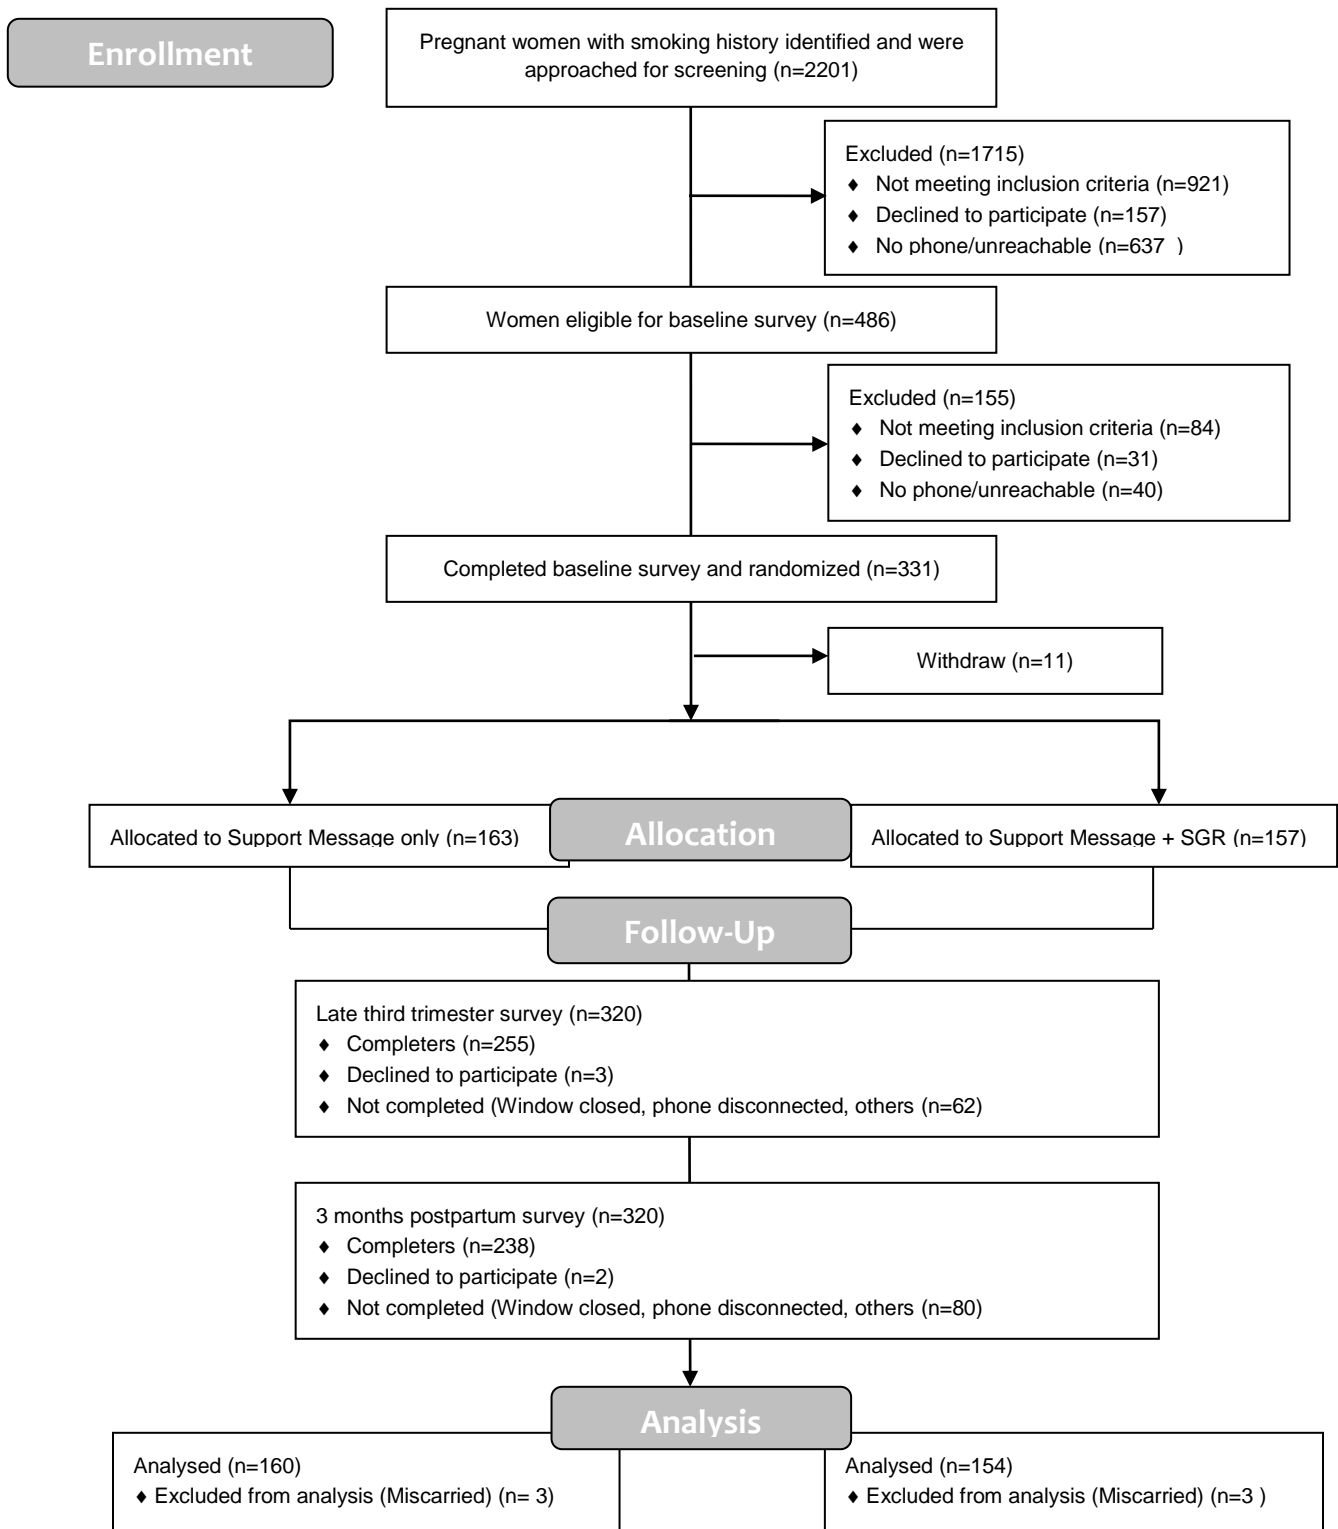

Supplement: ntz174_suppl_supplementary-figure.pdf [file ntz174_suppl_supplementary-figure.pdf]
